# Supplementary material
Source: Research Square preprint supplement (doi:10.21203/rs.3.rs-9962770/v1)
Supplement: Supplementary file 1 [file 56367f36f28c9a79ca9e1fdd.docx]

Table 3

The binding energy of the most tightly bound nuclei by using average coefficients of (2000—2457nuclides) by using Eq. 2.

| Nuclide | Exp 2020  BE/A (keV) [1] | Theo 2018 [2] | | |  | Theo 2024 [3] | | |  | Theo [Present work] | | |
| --- | --- | --- | --- | --- | --- | --- | --- | --- | --- | --- | --- | --- |
| BE/A (keV) | ΔBE/A (keV) | Relative error  (%) |  | BE/A (keV) | ΔBE/A (keV) | Relative error  (%) |  | BE/A (keV) | ΔBE/A (keV) | Relative error  (%) |
|  | 8794.556 | 8828.780 | -34.224 | 0.389 |  | 8823.245 | -28.689 | 0.326 |  | 8816.139 | -21.583 | 0.245 |
|  | 8792.253 | 8832.180 | -39.927 | 0.454 |  | 8828.298 | -36.045 | 0.409 |  | 8820.974 | -28.721 | 0.326 |
|  | 8790.356 | 8811.510 | -21.154 | 0.240 |  | 8805.797 | -15.441 | 0.175 |  | 8798.051 | -7.695 | 0.087 |
|  | 8780.777 | 8797.240 | -16.463 | 0.187 |  | 8790.353 | -9.576 | 0.109 |  | 8783.045 | -2.268 | 0.025 |
|  | 8777.967 | 8822.590 | -44.623 | 0.508 |  | 8821.014 | -43.047 | 0.490 |  | 8813.639 | -35.672 | 0.406 |
|  | 8777.464 | 8819.330 | -41.866 | 0.476 |  | 8816.148 | -38.684 | 0.440 |  | 8809.906 | -32.442 | 0.369 |
