# Supplementary material
Source: Research Square preprint supplement (doi:10.21203/rs.3.rs-9962770/v1)
Supplement: Supplementary file 2 [file 752bd0efd3f8ed372af994d9.docx]

Table 5

The most tightly bound nuclei with the mean binding energy per nucleon, and correspondingly lowest mass, for each value of atomic mass number (*A*) from theoretical calculations. The current theoretical results of Z and M are compared with theoretical results taken from reference **[15].**

| Mass number (A) | Present work | | Theo. Calc. [15] | |
| --- | --- | --- | --- | --- |
| Z | M | Z | M |
| 54 | 24.74 | 53.92 | 24.39 | 53.94 |
| 56 | 25.59 | 55.91 | 25.24 | 55.94 |
| 58 | 26.44 | 57.91 | 26.08 | 57.93 |
| 60 | 27.29 | 59.91 | 26.91 | 59.93 |
| 62 | 28.13 | 61.91 | 27.74 | 61.93 |
| 64 | 28.97 | 63.90 | 28.57 | 63.93 |
