# Supplementary material
Source: Research Square preprint supplement (doi:10.21203/rs.3.rs-9962770/v1)
Supplement: Supplementary file 3 [file b1dfa7e1064d3715d258620d.docx]

| Number of nuclei | BWMF plus extra terms | av | as | ac | asy | ap | aw | axc | ast | aR | Shell term | |
| --- | --- | --- | --- | --- | --- | --- | --- | --- | --- | --- | --- | --- |
| am | βm |
| 500 | BW + PT | 14.3884 | 14.2173 | 0.5856 | 19.1980 | 10.7291 | - | - | - | - | - | - |
| 1000 | BW+PT | 14.4230 | 14.2626 | 0.5932 | 19.2616 | 11.1287 | - | - | - | - | - | - |
| 1500 | BW+PT | 15.1399 | 15.9539 | 0.6675 | 21.5793 | 12.0304 | - | - | - | - | - | - |
| 2000 | BW+PT | 15.2354 | 16.2016 | 0.6766 | 21.8151 | 12.0514 | - | - | - | - | - | - |
| 2457 | BW+PT | 15.5414 | 16.9444 | 0.7033 | 23.0214 | 12.4998 | - | - | - | - | - | - |
| Average (1500, 2000 and 2457) | BW+PT+5T | 15.8749 | 21.7785 | 0.7327 | 29.2521 | 10.9424 | 48.7385 | 1.5269 | 46.3564 | 7.2997 | 1.9404 | 0.1423 |
| Average (2000 and 2457) | BW+PT | 15.4570 | 16.7707 | 0.6940 | 22.6139 | 12.3622 | - | - | - | - | - | - |
| BW+PT+5T | 16.0753 | 23.0547 | 0.7443 | 29.9031 | 10.9598 | 50.2953 | 1.6440 | 48.8942 | 9.1791 | 1.9038 | 0.1408 |
| 366 even-even nuclei;  Regional nuclei  (From O-16 to Gd-155) |
| BW+PT | 14.5779 | 14.4072 | 0.6170 | 19.9606 | 10.7291 | - | - | - | - | - | - |

Table 1

Best fit values of coefficients of the semi-empirical mass formula based on experimental data for 2457 nuclei, a subset of them for every 500 nuclei and a 366 even-even nuclei of oxygen-gadolinium mass region.
