# Supplementary material
Source: Research Square preprint supplement (doi:10.21203/rs.3.rs-9962770/v1)
Supplement: Supplementary file 4 [file bc6e06c25b34fe419fded33c.docx]

Table 4

The binding energy of the most tightly bound nuclei by using the average coefficients of [1500—2457] nuclei and of [2000—2457] nuclei by using Eq. 2.

| Nuclide | Exp 2020  BE/A (keV) [1] | [1500—2000] Nuclide | | |  | [2000—2457] Nuclide | | |  |
| --- | --- | --- | --- | --- | --- | --- | --- | --- | --- |
| BE/A (keV) | ΔBE/A (keV) | Relative error  (%) |  | BE/A (keV) | ΔBE/A (keV) | Relative error  (%) |  |
|  | 8794.556 |  | -14.120 | 0.161 |  |  | -13.062 | 0.149 |  |
|  | 8792.253 |  | 25.893 | 0.294 |  |  | 26.417 | 0.300 |  |
|  | 8790.356 |  | 27.543 | 0.313 |  |  | 28.087 | 0.320 |  |
|  | 8780.777 |  | -6.691 | 0.076 |  |  | -5.679 | 0.065 |  |
|  | 8777.967 |  | 29.365 | 0.335 |  |  | 30.141 | 0.343 |  |
|  | 8777.464 |  | -22.590 | 0.257 |  |  | -21.490 | 0.245 |  |
