# Supplementary material
Source: Research Square preprint supplement (doi:10.21203/rs.3.rs-9962770/v1)
Supplement: Supplementary file 5 [file ed830c0186368da08617f92e.docx]

Table 2

The binding energy of the most tightly bound nuclei by using the coefficients based on the best fitting of 500, 1000, 1500, 2000 and 2457 nuclei and the average binding energies of (500, 1000, 1500, 2000 and 2457 nuclides) by using Eq. 1.

| Nuclide | Exp 2020  BE/A (KeV) [1] | 500 Nuclide | | |  | 1000 Nuclide | | |  | 1500 Nuclide | | |
| --- | --- | --- | --- | --- | --- | --- | --- | --- | --- | --- | --- | --- |
| BE/A (keV) | ΔBE/A (keV) | Relative error  (%) |  | BE/A (keV) | ΔBE/A (keV) | Relative error  (%) |  | BE/A (keV) | ΔBE/A (keV) | Relative error  (%) |
|  | 8794.556 |  | 27.226 | 0.309 |  |  | 27.753 | 0.315 |  |  | -4.273 | 0.048 |
|  | 8792.253 |  | 21.294 | 0.242 |  |  | 20.697 | 0.235 |  |  | -12.499 | 0.142 |
|  | 8790.356 |  | 38.265 | 0.435 |  |  | 38.483 | 0.437 |  |  | 8.066 | 0.091 |
|  | 8780.777 |  | 40.965 | 0.466 |  |  | 42.334 | 0.482 |  |  | 14.125 | 0.160 |
|  | 8777.967 |  | 13.705 | 0.156 |  |  | 11.976 | 0.136 |  |  | -21.159 | 0.241 |
|  | 8777.464 |  | 15.963 | 0.181 |  |  | 15.811 | 0.180 |  |  | -15.967 | 0.181 |

Continue

| 2000 Nuclide | | |  | 2457 Nuclide | | |  | Avg | | |
| --- | --- | --- | --- | --- | --- | --- | --- | --- | --- | --- |
| BE/A (keV) | ΔBE/A (keV) | Relative error  (%) |  | BE/A (keV) | ΔBE/A (keV) | Relative error  (%) |  | BE/A  (keV) | ΔBE/A (keV) | Relative error  (%) |
|  | -6.238 | 0.070 |  |  | -29.197 | 0.331 |  | 8791.405 | 3.151 | 0.035 |
|  | -14.408 | 0.163 |  |  | -36.069 | 0.410 |  | 8796.450 | -4.197 | 0.047 |
|  | 6.890 | 0.078 |  |  | -15.465 | 0.175 |  | 8775.108 | 15.248 | 0.173 |
|  | 12.977 | 0.147 |  |  | -9.601 | 0.109 |  | 8760.616 | 20.161 | 0.229 |
|  | -22.852 | 0.260 |  |  | -43.071 | 0.490 |  | 8790.247 | -12.280 | 0.139 |
|  | -18.309 | 0.208 |  |  | -38.709 | 0.441 |  | 8785.706 | -8.242 | 0.093 |
